# Supplementary material for: Deep EST profiling of developing fenugreek endosperm to investigate galactomannan biosynthesis and its regulation
Source: Plant Mol Biol. 2012 Apr 17;79(3):243–58. doi: 10.1007/s11103-012-9909-y (PMC3349874; doi:10.1007/s11103-012-9909-y)
Supplement: Supplementary file 1 — Supplementary material 1 (PDF 282 kb) [file 11103_2012_9909_MOESM1_ESM.pdf]

## **Electronic supplementary material**

### **Deep EST profiling of developing fenugreek endosperm to investigate galactomannan biosynthesis and its regulation**

#### **Plant Molecular Biology**

**Yan Wang, Ana P. Alonso, Curtis G. Wilkerson, Kenneth Keegstra**

#### **Corresponding Author:**

Kenneth Keegstra  
MSU-DOE Plant Research Laboratory, Michigan State University, East Lansing, MI 48824,  
USA  
E-mail: keegstra@msu.edu

### **Supplementary material 1**

#### **Supplemental methods**

**Supplemental Fig. 1** Northern blot analysis of *ManS* and *GMGT*

**Supplemental Fig. 2** Cluster analysis of transcript levels of fenugreek endosperm-expressed genes at different ages

**Supplemental Table 2** Fenugreek endosperm-expressed genes encoding putative enzymes for biosyntheses of cellulose and xyloglucan

**Supplemental Table 3** Fenugreek endosperm-expressed genes encoding putative sucrose and nucleotide sugar transporters

**Supplemental Table 4** Fenugreek endosperm-expressed transcription factor genes with at least 100 EST reads

#### **Supplemental references**

### **Supplementary material 2 (as a separate Microsoft Excel document)**

**Supplemental Table 1** List of fenugreek contigs with at least 50 EST reads

## Supplemental methods

### Analysis of fenugreek endosperm EST database

The consensus sequences of fenugreek EST contigs and their annotation are available at the website <http://glbrc.bch.msu.edu/fenugreek>.

To generate the list of contigs with at least 50 EST reads (Supplemental Table 1), the “Minimum ESTs in library” was set to 10, the “Reduced into groups” selection was unchecked, and all of the four libraries were selected. As a result, a list of contigs with 10 or more EST reads found in at least one of the four libraries was shown. The contig list was saved as a Microsoft Excel document (in cvs format) by clicking on the “[Download Results]” link at the upper right corner of the web page. The contigs with less than 50 EST reads (totaled from the four libraries) were then eliminated. For contigs annotated as “No Definition Found”, their consensus sequences were used as queries to search the non-redundant nucleotide sequence database with the BLASTN program (<http://blast.ncbi.nlm.nih.gov/Blast.cgi>) to identify contigs for rRNA genes. The contigs for rRNA genes were eliminated from the contig list, and the EST abundance (expression level) for the remaining contigs was recalculated and shown as parts per million (ppm). The consensus sequences of the remaining contigs were searched against the non-redundant protein sequence database with the BLASTX program to identify the chimeric contigs (“hybrid” contigs containing sequences from two different genes) due to assembling errors, and to find possible close homologs from other species for contigs with no *Arabidopsis* hit found. The chimeric contigs were then eliminated, and some of the remaining contigs were annotated based on sequence similarity search results.

### Expression pattern analysis by Cluster and TreeView

After elimination of contigs for rRNA sequences, we recalculated the expression level of each endosperm-expressed gene, and normalized it as ppm. The expression level of each gene relative to 20 DPA (days post anthesis) was calculated and the resulting ratios were transformed to  $\log_2$  values. Gene expression patterns were determined using a hierarchical clustering algorithm as implemented in Cluster (Eisen et al. 1998), with uncentered correlation similarity and average linkage clustering. The results from the Cluster analysis were then visualized as a heat map using TreeView (Eisen et al. 1998).

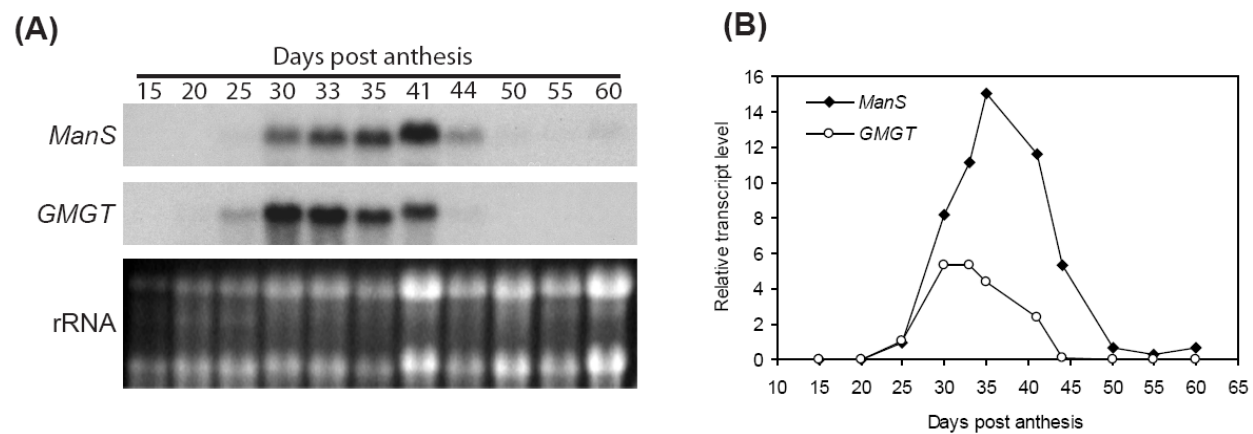

**Supplemental Fig. 1** Northern blot analysis of *ManS* and *GMGT*. **a** Northern blot data generated using total RNA from fenugreek developing seeds. **b** Quantification of the data. Relative transcript levels are expressed relative to the 25 DPA (days post anthesis) age

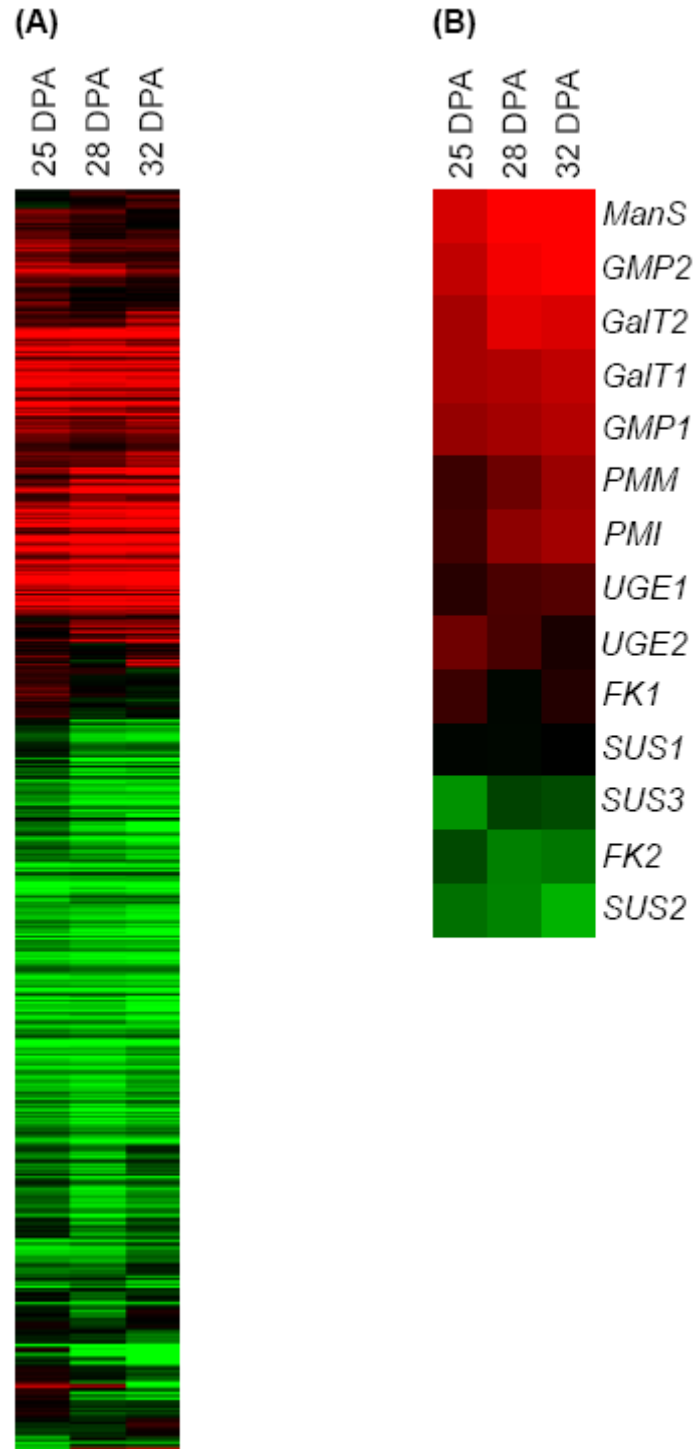

**Supplemental Fig. 2** Cluster analysis of transcript levels of fenugreek endosperm-expressed genes at different ages. All measurements are relative to 20 DPA. The color scale is set from saturated green for log<sub>2</sub> ratios -3 and below to saturated red for log<sub>2</sub> ratios of 3 and above. Each gene is shown by a single row of colored boxes, and each age is shown by a single column. Green boxes and red boxes indicate down regulation and up regulation of gene expression during fenugreek endosperm development. **a** Heat map of approximately 1,650 contigs assembled from at least 100 EST reads. **b** Heat map of putative fenugreek genes involved in galactomannan biosynthesis. The designations of the genes are listed in Table 2.

**Supplemental Table 2** Fenugreek endosperm-expressed genes encoding putative enzymes for biosyntheses of cellulose and xyloglucan

| Rank  | Number<br>of ESTs | Putative fenugreek gene                          | <i>Arabidopsis</i><br>best hit | Expression (ppm) |        |        |        |
|-------|-------------------|--------------------------------------------------|--------------------------------|------------------|--------|--------|--------|
|       |                   |                                                  |                                | 20 DPA           | 25 DPA | 28 DPA | 32 DPA |
| 1030  | 172               | Cellulose synthase 2 ( <i>CESA2</i> )            | <i>At4g39350</i>               | 235              | 82     | 65     | 85     |
| 1135  | 156               | Cellulose synthase 9 ( <i>CESA9</i> )            | <i>At2g21770</i>               | 251              | 96     | 49     | 16     |
| 1808  | 97                | Cellulose synthase 3 ( <i>CESA3</i> )            | <i>At5g05170</i>               | 99               | 33     | 48     | 88     |
| 8459  | 15                | Cellulose synthase 1 ( <i>CESA1</i> )            | <i>At4g32410</i>               | 10               | 14     | 6      | 10     |
| 8459  | 15                | Cellulose synthase 7 ( <i>CESA7</i> )            | <i>At5g17420</i>               | 40               | 0      | 0      | 0      |
| 11443 | 10                | Xyluglucan glucan synthase ( <i>CSLC4</i> )      | <i>At3g28180</i>               | 27               | 0      | 0      | 0      |
| 1680  | 104               | Xyloglucan xylosyltransferase 2 ( <i>XT2</i> )   | <i>At4g02500</i>               | 75               | 59     | 75     | 67     |
| 13567 | 8                 | Xyloglucan galactosyltransferase ( <i>MUR3</i> ) | <i>At2g20370</i>               | 5                | 3      | 10     | 0      |
| 8459  | 15                | Xyloglucan fucosyltransferase ( <i>FUT1</i> )    | <i>At2g03220</i>               | 3                | 14     | 8      | 16     |

If more than one fenugreek contig had the highest similarity to the same *Arabidopsis* gene, only the one with more or the most EST reads is shown.

**Supplemental Table 3** Fenugreek endosperm-expressed genes encoding putative sucrose and nucleotide sugar transporters

| Annotation                                            | ESTs | <i>Arabidopsis</i><br>best hit | Expression (ppm) |        |        |        |
|-------------------------------------------------------|------|--------------------------------|------------------|--------|--------|--------|
|                                                       |      |                                | 20 DPA           | 25 DPA | 28 DPA | 32 DPA |
| Sucrose-proton symporter (SUC)                        | 602  | At1g71890                      | 375              | 499    | 331    | 447    |
| Nucleotide sugar transporter 2 (NST2)                 | 563  | At1g77610                      | 176              | 347    | 459    | 534    |
| Nucleotide sugar transporter 1 (NST1)                 | 501  | At4g39390                      | 366              | 347    | 321    | 308    |
| Phosphate translocator-related (pPThKT)               | 119  | At5g25400                      | 32               | 73     | 100    | 115    |
| Transporter-related (pPThKT)                          | 109  | At1g34020                      | 80               | 87     | 55     | 77     |
| Transporter-related (pPThKT)                          | 106  | At5g42420                      | 113              | 50     | 55     | 71     |
| Phosphate translocator-related (pPThKT)               | 101  | At5g25400                      | 51               | 100    | 77     | 37     |
| Phosphate translocator-related (pPThKT)               | 81   | At5g25400                      | 93               | 36     | 35     | 57     |
| Nucleotide-sugar transmembrane transporter            | 59   | At2g43240                      | 58               | 40     | 31     | 27     |
| Transporter-related (pPThKT)                          | 50   | At1g06890                      | 56               | 30     | 18     | 34     |
| Transporter-related (pPThKT)                          | 46   | At1g34020                      | 58               | 33     | 14     | 20     |
| Integral membrane family protein (GONST4)             | 45   | At5g19980                      | 30               | 37     | 25     | 30     |
| Triose-phosphate transmembrane transporter (PPT1)     | 44   | At5g33320                      | 61               | 23     | 21     | 10     |
| Organic anion transmembrane transporter (pPThKVAG)    | 43   | At3g11320                      | 67               | 17     | 10     | 24     |
| UDP-galactose transporter 3 (UTR3)                    | 34   | At1g14360                      | 13               | 9      | 29     | 41     |
| Nucleotide-sugar transporter family protein           | 29   | At5g41760                      | 48               | 6      | 10     | 14     |
| Nucleotide-sugar transporter family protein           | 26   | At5g65000                      | 35               | 6      | 10     | 20     |
| UTR3 (UDP-GALACTOSE TRANSPORTER 3)                    | 25   | At1g14360                      | 0                | 23     | 10     | 41     |
| Glucose-6-phosphate/phosphate translocator 2 (GPT2)   | 23   | At1g61800                      | 16               | 9      | 18     | 16     |
| Phosphate translocator-related (pPThKD)               | 18   | At4g32390                      | 30               | 17     | 3      | 0      |
| Integral membrane family protein (GONST4)             | 16   | At5g19980                      | 8                | 17     | 4      | 16     |
| Glucose-6-phosphate/phosphate translocator 2 (GPT2)   | 16   | At1g61800                      | 5                | 23     | 10     | 4      |
| Phosphate translocator-related (pPThKD)               | 16   | At4g32390                      | 38               | 3      | 3      | 0      |
| Glucose-6-phosphate transporter 1 (GPT1)              | 15   | At5g54800                      | 16               | 12     | 4      | 10     |
| UDP-galactose transporter 6 (UTR6)                    | 13   | At3g59360                      | 21               | 9      | 4      | 0      |
| Glucose-6-phosphate/phosphate translocator (UDPGalT1) | 12   | At1g77610                      | 5                | 6      | 6      | 16     |

Putative nucleotide sugar transporter (NST) genes were identified by searching the fenugreek EST database using the gene identity (AGI) numbers of known and predicted *Arabidopsis* NSTs summarized by Reyes and Orellana (2008). Putative transporter genes with at least 10 EST reads are shown.

**Supplemental Table 4** Fenugreek endosperm-expressed transcription factor genes with at least 100 EST reads

| Annotation                                                                     | ESTs | <i>Arabidopsis</i><br>best hit | Expression (ppm) |        |        |        |
|--------------------------------------------------------------------------------|------|--------------------------------|------------------|--------|--------|--------|
|                                                                                |      |                                | 20 DPA           | 25 DPA | 28 DPA | 32 DPA |
| HAP5C (heme activated protein 5C); CCAAT family                                | 2221 | At1g08970                      | 468              | 2622   | 1607   | 1275   |
| IDD5 (indeterminate(ID)-domain 5); C2H2 family                                 | 808  | At2g02070                      | 292              | 715    | 567    | 615    |
| L1L (leafy cotyledon 1-related); CCAAT family                                  | 685  | At5g47670                      | 375              | 593    | 469    | 396    |
| RAP2.3 (related to AP2.3); AP2-EREBP family                                    | 537  | At3g16770                      | 441              | 649    | 273    | 65     |
| AGL104 (agamous-like 104); MADS family                                         | 491  | At1g22130                      | 131              | 376    | 413    | 389    |
| HMGB2 (high mobility group B 2); HMG family                                    | 443  | At1g20693                      | 244              | 320    | 286    | 355    |
| WOX11 (wuschel related homeobox 11); HB family                                 | 393  | At3g03660                      | 409              | 283    | 234    | 105    |
| HMGB2 (high mobility group B 2); HMG family                                    | 370  | At1g20693                      | 93               | 190    | 382    | 294    |
| WRKY21 (WRKY DNA-binding protein 21); WRKY family                              | 340  | At2g30590                      | 278              | 236    | 198    | 203    |
| NAC10 (NAC domain containing protein 10); NAC family                           | 326  | At1g28470                      | 73               | 202    | 318    | 260    |
| ERF/AP2 transcription factor family protein; AP2-EREBP family                  | 290  | At1g75490                      | 27               | 126    | 248    | 400    |
| ADA2B/PRZ1 (PROPORZ1); MYB-related family                                      | 289  | At4g16420                      | 380              | 227    | 96     | 77     |
| HD2C (histone deacetylase 2C); C2H2 family                                     | 280  | At5g03740                      | 438              | 123    | 82     | 118    |
| Zinc finger (CCCH-type) family protein                                         | 278  | At5g44260                      | 78               | 202    | 223    | 247    |
| Trihelix DNA-binding protein; Trihelix family                                  | 269  | At1g76880                      | 152              | 199    | 156    | 233    |
| DNA-binding storekeeper protein-related; GeBP family                           | 264  | At1g61730                      | 214              | 226    | 118    | 169    |
| ERF9 (ERF domain protein 9); AP2-EREBP family                                  | 262  | At5g44210                      | 38               | 193    | 244    | 219    |
| MBF1B (multiprotein bridging factor 1B); MBF1 family                           | 247  | At3g58680                      | 80               | 196    | 172    | 230    |
| SHL1 (short life 1); PHD family                                                | 240  | At4g39100                      | 61               | 126    | 213    | 244    |
| IDD5 (indeterminate(ID)-domain 5); C2H2 family                                 | 213  | At2g02070                      | 310              | 163    | 61     | 41     |
| LBD41 (LOB domain-containing protein 41); LOB family                           | 206  | At3g02550                      | 211              | 289    | 44     | 24     |
| Zinc finger (C2H2 type) family protein                                         | 178  | At3g02790                      | 21               | 180    | 131    | 152    |
| WOX9 (wuschel-related homeobox 9); HB family                                   | 177  | At2g33880                      | 222              | 134    | 49     | 81     |
| GeBP family protein                                                            | 175  | At4g25210                      | 131              | 114    | 90     | 148    |
| TLP3 (TUBBY like protein 3); TUB family                                        | 173  | At2g47900                      | 235              | 137    | 55     | 41     |
| SCL5 (scarecrow-like 5); GRAS family                                           | 170  | At1g50600                      | 83               | 76     | 159    | 126    |
| bZIP family transcription factor                                               | 163  | At5g06839                      | 198              | 93     | 108    | 16     |
| SUVH4 (SU(VAR)3-9 homolog 4); SET (PcG) family                                 | 162  | At5g13960                      | 192              | 131    | 62     | 51     |
| DR1 (TATA-binding protein-associated phosphoprotein Dr1 protein); CCAAT family | 153  | At5g23090                      | 73               | 129    | 113    | 95     |
| PKL (PICKLE); PHD family                                                       | 152  | At2g25170                      | 275              | 53     | 42     | 37     |
| AP2 domain-containing TF family protein; AP2-EREBP family                      | 149  | At4g13040                      | 43               | 73     | 121    | 169    |
| Zinc finger (CCCH-type) family protein; C3H family                             | 149  | At2g20280                      | 141              | 110    | 77     | 71     |
| MYB family transcription factor                                                | 141  | At5g41020                      | 70               | 107    | 104    | 95     |
| AGL66 (agamous-like 66); MADS family                                           | 140  | At1g77980                      | 3                | 117    | 125    | 132    |
| SUVH1 (SU(VAR)3-9 homolog 1); SET (PcG) family                                 | 139  | At5g04940                      | 232              | 56     | 42     | 44     |
| ANL2 (anthocyaninless 2); HB family                                            | 138  | At4g00730                      | 187              | 79     | 45     | 65     |
| HMGB6 (high mobility group B 6); HMG family                                    | 138  | At5g23420                      | 67               | 106    | 92     | 112    |
| JAZ12/TIFY3B (jasmonate-ZIM-domain protein 12); ZIM family                     | 137  | At5g20900                      | 61               | 84     | 110    | 108    |
| LBD41 (LOB domain-containing protein 41); LOB family                           | 137  | At3g02550                      | 30               | 103    | 127    | 101    |
| ARF10 (auxin response factor 10); ARF family                                   | 135  | At2g28350                      | 121              | 90     | 71     | 85     |
| OBP3 (OBF-binding protein 3); C2C2-Dof family                                  | 135  | At3g55370                      | 121              | 90     | 83     | 65     |
| AIL7 (aintegumenta-like 7); AP2-EREBP family                                   | 134  | At5g65510                      | 174              | 96     | 39     | 57     |
| DNA-binding family protein; MYB-related family                                 | 133  | At1g72740                      | 163              | 67     | 52     | 81     |
| ARF2 (auxin response factor 2); ARF family                                     | 132  | At5g62000                      | 123              | 37     | 65     | 142    |
| Zinc finger (CCCH-type) family protein                                         | 129  | At3g48440                      | 259              | 37     | 29     | 16     |
| DNA binding / transcription factor; GARP-G2-like family                        | 128  | At2g38300                      | 113              | 90     | 82     | 55     |

**Supplemental Table 4** (continued)

| Putative fenugreek transcription factor              | ESTs | <i>Arabidopsis</i><br>best hit | Expression (ppm) |        |        |        |
|------------------------------------------------------|------|--------------------------------|------------------|--------|--------|--------|
|                                                      |      |                                | 20 DPA           | 25 DPA | 28 DPA | 32 DPA |
| Zinc finger (C2H2 type) family protein; C2H2 family  | 124  | At3g10470                      | 251              | 70     | 13     | 1      |
| Zinc finger (C2H2 type) family protein               | 120  | At3g02790                      | 70               | 79     | 69     | 115    |
| HB23 (homeobox protein 23); ZF-HD family             | 119  | At5g39760                      | 126              | 47     | 56     | 98     |
| STO (salt tolerance); Orphans family                 | 119  | At1g06040                      | 91               | 117    | 52     | 67     |
| NAC75 (NAC domain containing protein 75); NAC family | 117  | At4g29230                      | 106              | 87     | 52     | 75     |
| RAP2.2; AP2-EREBP family                             | 116  | At3g14230                      | 86               | 64     | 71     | 95     |
| bZIP transcription factor (bZIP69); bZIP family      | 115  | At1g06070                      | 113              | 64     | 77     | 47     |
| ARF2 (auxin response factor 2); ARF family           | 110  | At5g62000                      | 192              | 44     | 25     | 37     |
| WRKY11 (WRKY DNA-binding protein 11); WRKY family    | 110  | At4g31550                      | 106              | 67     | 73     | 41     |
| PHD finger family protein; Alfin-like family         | 110  | At5g26210                      | 136              | 59     | 65     | 27     |
| HMGB2 (high mobility group B 2); HMG family          | 110  | At1g20693                      | 53               | 50     | 62     | 146    |
| Trihelix DNA-binding protein; Trihelix family        | 108  | At1g76880                      | 139              | 40     | 52     | 57     |
| MBF1A (multiprotein bridging factor 1A); MYB1 family | 107  | At2g42680                      | 78               | 73     | 62     | 77     |
| HAP2A; CCAAT family                                  | 103  | At5g12840                      | 86               | 107    | 38     | 55     |
| RWP-RK domain-containing protein; RWP-RK family      | 102  | At4g35590                      | 134              | 56     | 49     | 30     |
| HMGB1 (high mobility group B 1); HMG family          | 102  | At3g51880                      | 43               | 82     | 69     | 85     |
| AGL15 (agamous-like 15); MADS family                 | 100  | At5g13790                      | 101              | 107    | 29     | 37     |

Putative transcription factor (TF) genes were identified by searching the fenugreek EST database using the key word “transcription factor”. The list of the TF genes was downloaded from the database website and saved as described in the Supplemental Methods. To confirm the annotations of the TF genes, the identity (AGI) numbers of the *Arabidopsis* best hits were used to search two TF databases (<http://plntfdb.bio.uni-potsdam.de/v3.0/> and <http://datf.cbi.pku.edu.cn/index.php>). If no AGI was found in the databases, the corresponding fenugreek gene was eliminated from the list. Putative TF genes with at least 100 EST reads are shown.

### **Supplemental references**

- Eisen MB, Spellman PT, Brown PO, Botstein D (1998) Cluster analysis and display of genome-wide expression patterns. *Proc Natl Acad Sci U S A* 95:14863-14868
- Reyes F, Orellana A (2008) Golgi transporters: opening the gate to cell wall polysaccharide biosynthesis. *Curr Opin Plant Biol* 11:244-251
